# Supplementary material for: Attitudes of Lebanese pharmacists towards online and live continuing education sessions
Source: PubMed Central journal article supplement — Pharm Pract (Granada). 2019 Jun 4;17(2):1438. doi: 10.18549/PharmPract.2019.2.1438 (PMC6594437; doi:10.18549/pharmpract.2019.2.1438), 2019-06-04
Supplement: pharmpract-17-1438-suppl.pdf [file pharmpract-17-1438-suppl.pdf]

| <b>Online appendix Table 1. Description of the answers to each question of the motivation, value and general confidence with computer use scales.</b> |                       |              |                |                 |                          |             |
|-------------------------------------------------------------------------------------------------------------------------------------------------------|-----------------------|--------------|----------------|-----------------|--------------------------|-------------|
| <b>QUESTION</b>                                                                                                                                       | <b>Strongly agree</b> | <b>Agree</b> | <b>Neutral</b> | <b>Disagree</b> | <b>Strongly disagree</b> |             |
| <b>General confidence with computer use</b>                                                                                                           |                       |              |                |                 |                          |             |
| 1. I find it easier to learn how to use a computer than I do learning other things.                                                                   | 134 (21.3%)           | 277 (44.1%)  | 158 (25.2%)    | 34.6%           | 12 (1.9%)                |             |
| 2. When I have difficulties using a computer I know I can handle them.                                                                                | 111 (17.7%)           | 343 (54.6%)  | 115 (18.3%)    | 49 (7.8%)       | 10 (1.6%)                |             |
| 3. I am not what I would call a computer person.                                                                                                      | 72 (11.5%)            | 130 (20.7%)  | 219 (34.9%)    | 171 (27.2%)     | 36 (5.7%)                |             |
| 4. It takes me much longer to understand how to use computers than the average person.                                                                | 146 (23.2%)           | 249 (39.6%)  | 152 (24.2%)    | 72 (11.5%)      | 9 (1.4%)                 |             |
| 5. I have never felt myself able to learn how to use computers.                                                                                       | 206 (32.8%)           | 230 (36.6%)  | 128 (20.4%)    | 57 (9.1%)       | 7 (1.1%)                 |             |
| 6. I enjoy trying new things on a computer.                                                                                                           | 146 (23.2%)           | 289 (46.0%)  | 143 (22.8%)    | 43 (6.8%)       | 7 (1.1%)                 |             |
| 7. I find having to use computers frightening.                                                                                                        | 196 (31.2%)           | 202 (32.2%)  | 171 (27.2%)    | 53 (8.4%)       | 6 (1.0%)                 |             |
| 8. I find many aspects of using computers interesting and challenging.                                                                                | 133 (21.2%)           | 309 (49.2%)  | 150 (23.9%)    | 31 (4.9%)       | 5 (0.8%)                 |             |
| 9. I don't understand how some people can enjoy spending so much time using computers.                                                                | 64 (10.2%)            | 124 (19.7%)  | 275 (43.8%)    | 131 (20.9%)     | 34 (5.4%)                |             |
| 10. I have never been very excited about using computers.                                                                                             | 75 (11.9%)            | 155 (24.7%)  | 266 (42.4%)    | 115 (18.3%)     | 17 (2.7%)                |             |
| 11. I find using computers confusing.                                                                                                                 | 123 (19.6%)           | 243 (38.7%)  | 199 (31.7%)    | 58 (9.2%)       | 5 (0.8%)                 |             |
| 12. I'm nervous that I'm not good enough with computers to be able to use them for continuing education.                                              | 139 (22.1%)           | 228 (36.3%)  | 181 (28.8%)    | 64 (10.2%)      | 16 (2.5%)                |             |
|                                                                                                                                                       | <b>Strongly agree</b> | <b>Agree</b> | <b>Neutral</b> | <b>Disagree</b> | <b>Strongly disagree</b> | <b>N/A</b>  |
| <b>My value and general perception of continuing education</b>                                                                                        |                       |              |                |                 |                          |             |
| 1. Generally CE is valuable                                                                                                                           | 181 (28.8%)           | 320 (51.0%)  | 91 (14.5%)     | 21 (3.3%)       | 9 (1.4%)                 | 6 (1.0%)    |
| 2. Generally CE improves my practice                                                                                                                  | 157 (25.0%)           | 295 (47.0%)  | 119 (18.9%)    | 37 (5.9%)       | 11 (1.8%)                | 9 (1.4%)    |
| 3. Generally CE increases my knowledge                                                                                                                | 185 (29.5%)           | 331 (52.7%)  | 80 (12.7%)     | 19 (3.0%)       | 7 (1.1%)                 | 6 (1.0%)    |
| 4. Generally my employer values CE (employed pharmacists only)                                                                                        | 47 (7.5%)             | 130 (20.7%)  | 217 (34.6%)    | 29 (4.6%)       | 17 (2.7%)                | 187 (29.8%) |
| <b>I am motivated for adhering to continuing education because</b>                                                                                    |                       |              |                |                 |                          |             |
| 5. It is required to maintain my pharmacy license                                                                                                     | 120 (19.1%)           | 296 (47.1%)  | 138 (22.0%)    | 42 (6.7%)       | 16 (2.5%)                | 15 (2.4%)   |
| 6. I want a career advancement related to CE                                                                                                          | 113 (18.0%)           | 273 (43.5%)  | 171 (27.2%)    | 37 (5.9%)       | 14 (2.2%)                | 19 (3.0%)   |
| 7. I like learning with other pharmacists                                                                                                             | 103 (16.4%)           | 295 (47.0%)  | 181 (28.8%)    | 23 (3.7%)       | 13 (2.1%)                | 13 (2.1%)   |
| 8. I like being able to help patients I take care of                                                                                                  | 218 (24.8%)           | 316 (50.3%)  | 65 (10.4%)     | 7 (1.1%)        | 4 (0.6%)                 | 17 (2.7%)   |
| 9. I am encouraged by my family to learn more                                                                                                         | 82 (13.1%)            | 203 (32.4%)  | 258 (41.1%)    | 41 (6.5%)       | 15 (2.4%)                | 28 (4.5%)   |
| 10. I want to earn more money                                                                                                                         | 75 (12.0%)            | 154 (24.6%)  | 263 (41.9%)    | 74 (11.8%)      | 32 (5.1%)                | 29 (4.6%)   |
| 11. I want to keep up with advances in pharmacy                                                                                                       | 219 (34.9%)           | 318 (50.6%)  | 71 (11.3%)     | 7 (1.1%)        | 2 (0.3%)                 | 11 (1.8%)   |
| 12. I am interested in long-term CE programs with certification                                                                                       | 152 (24.2%)           | 249 (39.6%)  | 178 (28.3%)    | 30 (4.8%)       | 7 (1.1%)                 | 12 (1.9%)   |
| 13. I am <b>not</b> motivated and I did <b>not</b> start any CE                                                                                       | 14 (2.2%)             | 50 (8.0%)    | 165 (26.3%)    | 160 (25.5%)     | 142 (22.6%)              | 97 (15.4%)  |

| <b>Online appendix Table 2. Principal component analysis results of the motivation, value and general confidence with computer use scales items.</b> |                                                    |                 |                    |                         |                 |
|------------------------------------------------------------------------------------------------------------------------------------------------------|----------------------------------------------------|-----------------|--------------------|-------------------------|-----------------|
|                                                                                                                                                      | <b>General confidence with computer use scales</b> |                 | <b>Value scale</b> | <b>Motivation scale</b> |                 |
|                                                                                                                                                      | <b>Factor 1</b>                                    | <b>Factor 2</b> | <b>Factor 1</b>    | <b>Factor 1</b>         | <b>Factor 2</b> |
| I have never felt myself able to learn how to use computers.                                                                                         | 0.865                                              |                 |                    |                         |                 |
| It takes me much longer to understand how to use computers than the average person.                                                                  | 0.839                                              |                 |                    |                         |                 |
| I find having to use computers frightening.                                                                                                          | 0.838                                              |                 |                    |                         |                 |
| I find using computers confusing.                                                                                                                    | 0.800                                              |                 |                    |                         |                 |
| I'm nervous that I'm not good enough with computers to be able to use them for continuing education.                                                 | 0.706                                              |                 |                    |                         |                 |
| I have never been very excited about using computers.                                                                                                | 0.657                                              |                 |                    |                         |                 |
| I am not what I would call a computer person.                                                                                                        | 0.636                                              |                 |                    |                         |                 |
| I don't understand how some people can enjoy spending so much time using computers.                                                                  | 0.631                                              |                 |                    |                         |                 |
| I find it easier to learn how to use a computer than I do learning other things.                                                                     |                                                    | 0.760           |                    |                         |                 |
| I enjoy trying new things on a computer.                                                                                                             |                                                    | 0.753           |                    |                         |                 |
| When I have difficulties using a computer I know I can handle them.                                                                                  |                                                    | 0.721           |                    |                         |                 |
| I find many aspects of using computers interesting and challenging.                                                                                  |                                                    | 0.712           |                    |                         |                 |
| Generally CE increases my knowledge                                                                                                                  |                                                    |                 | 0.944              |                         |                 |
| Generally CE improves my practice                                                                                                                    |                                                    |                 | 0.937              |                         |                 |
| Generally CE is valuable                                                                                                                             |                                                    |                 | 0.933              |                         |                 |
| Generally my employer values CE (employed pharmacists only)                                                                                          |                                                    |                 | 0.902              |                         |                 |
| I want to keep up with advances in pharmacy                                                                                                          |                                                    |                 |                    | 0.841                   |                 |
| I like being able to help patients I take care of                                                                                                    |                                                    |                 |                    | 0.824                   |                 |
| I am interested in long-term CE programs with certification                                                                                          |                                                    |                 |                    | 0.812                   |                 |
| I want a career advancement related to CE                                                                                                            |                                                    |                 |                    | 0.803                   |                 |
| I like learning with other pharmacists                                                                                                               |                                                    |                 |                    | 0.765                   |                 |
| It is required to maintain my pharmacy license                                                                                                       |                                                    |                 |                    | 0.544                   |                 |
| I am not motivated and I did not start any CE                                                                                                        |                                                    |                 |                    |                         | 0.762           |
| I want to earn more money                                                                                                                            |                                                    |                 |                    |                         | 0.672           |
| I am encouraged by my family to learn more                                                                                                           |                                                    |                 |                    |                         | 0.526           |

**Online Appendix. Continuing Education Assessment Survey for Pharmacists**

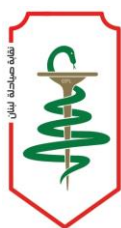

نقابة صيادلة لبنان  
ORDER OF PHARMACISTS OF LEBANON

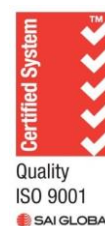

OPL ID:

## Continuing Education Assessment Survey for Pharmacists

This survey seeks Lebanese pharmacists' opinion about the mandatory Continuing Education (CE) Program implemented by the Lebanese Order of Pharmacists in January 2014. It takes about 15 minutes to complete and all data obtained are anonymous; they will be kept strictly confidential and will be used for research purposes and improvement of the CE program only.

### DEMOGRAPHICS

**1. Age:**

**2. Gender:**  M  F

**3. Level of education:**  BS Pharmacy  PharmD, Doctorat d'exercice  Masters  PhD  
 Other: \_\_\_\_\_

**4. Year of graduation from school/faculty of pharmacy:** \_\_\_\_\_

**5. Total number of years of practicing pharmacy:** \_\_\_\_\_

**6. University you graduated from as pharmacist:**

UL  USJ  BAU  LAU  LIU

Other: \_\_\_\_\_

**7. Language of pharmacy education:**

French  English  Other: \_\_\_\_\_

**8. Sector of work:**

Community (Owner)  Community (Employee)

Hospital/Clinical

Scientific Office/Importer  Academia  Public Sector (MOPH, Army, NSSF...)

Industry  Currently not working  Other: \_\_\_\_\_

**9. Work Location:**

- Beirut Mount Lebanon North Lebanon South Lebanon Bekaa  
Nabatieh Currently not working

**10. Number of patients received per day (community pharmacists only):**

- <10  10-50  50-100  >100  I am not a community

pharmacist

**11. Number of beds at the hospital (hospital pharmacists only):**

- <50  50-100  101-300  >300  I am not a hospital pharmacist

**12. Number of working days per week:** \_\_\_\_\_

**13. Number of working hours per day:** \_\_\_\_\_

**TECHNOLOGY AND COMPUTER LITERACY**

---

**14. Available connected device(s):**

- Computer  Smart Phone  Tablet  No connected devices

**15. What type is your smart phone?:**  iOS (iPhone)  Android (Samsung, Huawei..)

Other: \_\_\_\_\_

**16. Are you connected to the internet for at least 4 hours per day:**  Yes

No

I can connect when needed (Internet café, neighbors...)

**17. Do you find it difficult to access your OPL e-library account?**

- Difficult  Intermediate  Easy  Never tried

**18. Do you find it difficult to use OPL Swank platform and take online courses?**

- Difficult  Intermediate  Easy  Never tried

## FOGARTY SUB-SCALE FOR COMPUTER LITERACY

**19. The following statements refer to your confidence when using computers.**

| QUESTION                                                                                                 | Strongly agree | Agree | Neutral | Disagree | Strongly disagree |
|----------------------------------------------------------------------------------------------------------|----------------|-------|---------|----------|-------------------|
| 1. I find it easier to learn how to use a computer than I do learning other things.                      |                |       |         |          |                   |
| 2. When I have difficulties using a computer I know I can handle them.                                   |                |       |         |          |                   |
| 3. I am not what I would call a computer person.                                                         |                |       |         |          |                   |
| 4. It takes me much longer to understand how to use computers than the average person.                   |                |       |         |          |                   |
| 5. I have never felt myself able to learn how to use computers.                                          |                |       |         |          |                   |
| 6. I enjoy trying new things on a computer.                                                              |                |       |         |          |                   |
| 7. I find having to use computers frightening.                                                           |                |       |         |          |                   |
| 8. I find many aspects of using computers interesting and challenging.                                   |                |       |         |          |                   |
| 9. I don't understand how some people can enjoy spending so much time using computers.                   |                |       |         |          |                   |
| 10. I have never been very excited about using computers.                                                |                |       |         |          |                   |
| 11. I find using computers confusing.                                                                    |                |       |         |          |                   |
| 12. I'm nervous that I'm not good enough with computers to be able to use them for continuing education. |                |       |         |          |                   |

*Fogarty G, Cretchley P, Harman C, Ellerton N, Konki N. Validation of a questionnaire to measure mathematics confidence, computer confidence, and attitudes towards the use of technology for learning mathematics. Mathematics Education Research Journal. 2001 Sep 1;13(2):154-60.*  
[https://eprints.usq.edu.au/953/1/Fogarty\\_Fogarty-Cretchley-Harman-Ellerton-Konki\\_Valid\\_of\\_questionnaire\\_maths.pdf](https://eprints.usq.edu.au/953/1/Fogarty_Fogarty-Cretchley-Harman-Ellerton-Konki_Valid_of_questionnaire_maths.pdf)

## COMMUNICATION WITH THE OPL

**20. Do you have the OPL mobile application?:** Yes No

**21. Do you read the messages OPL is sending through the app or by SMS?**

Yes No Sometimes

**22. Do you know the number of credits to be achieved by December 2019?**

Yes No More or less

**23. Are you aware of the number of credits you earned to this date?**

Yes No More or less

## CONTINUING EDUCATION (CE)

### 24. Value and Motivation to adhere to Continuing Education

| QUESTION                                                           | Strongly agree | Agree | Neutral | Disagree | Strongly disagree | N/A |
|--------------------------------------------------------------------|----------------|-------|---------|----------|-------------------|-----|
| <b>My value and general perception of continuing education</b>     |                |       |         |          |                   |     |
| 1. Generally CE is valuable                                        |                |       |         |          |                   |     |
| 2. Generally CE improves my practice                               |                |       |         |          |                   |     |
| 3. Generally CE increases my knowledge                             |                |       |         |          |                   |     |
| 4. Generally my employer values CE (employed pharmacists only)     |                |       |         |          |                   |     |
| <b>I am motivated for adhering to continuing education because</b> |                |       |         |          |                   |     |
| 5. It is required to maintain my pharmacy license                  |                |       |         |          |                   |     |
| 6. I want a career advancement related to CE                       |                |       |         |          |                   |     |
| 7. I like learning with other pharmacists                          |                |       |         |          |                   |     |
| 8. I like being able to help patients I take care of               |                |       |         |          |                   |     |
| 9. I am encouraged by my family to learn more                      |                |       |         |          |                   |     |
| 10. I want to earn more money                                      |                |       |         |          |                   |     |
| 11. I want to keep up with advances in pharmacy                    |                |       |         |          |                   |     |
| 12. I am interested in long-term CE programs with certification    |                |       |         |          |                   |     |
| 13. I am <b>not</b> motivated and I did <b>not</b> start any CE    |                |       |         |          |                   |     |

### 25. Type(s) of Continuing Education you used to do? (you can choose more than 1)

- None   
  Live (conferences, congresses, seminars...)   
  Online Courses   
  Webinar  
 Printed material   
  Long-term courses with certification (Masters, University Diploma..)
- Workshop   
  Other: \_\_\_\_\_

### 26. Type of Continuing Education you prefer? (choose only 1)

- None   
  Live (conferences, congresses, seminars...)   
  Online Courses   
  Webinar  
 Printed material   
  Long-term courses with certification (Masters, University Diploma..)
- Workshop   
  Other: \_\_\_\_\_

**27. Reasons that generally prevent/prevented you from attending live CE:**

| QUESTION                                                                                               | Strongly agree        | Agree        | Neutral        | Disagree        | Strongly disagree        | Not Applicable        |
|--------------------------------------------------------------------------------------------------------|-----------------------|--------------|----------------|-----------------|--------------------------|-----------------------|
| 1. Cost of transportation                                                                              |                       |              |                |                 |                          |                       |
| 2. Distance and traffic to venue                                                                       |                       |              |                |                 |                          |                       |
| 3. Timing of the talk                                                                                  |                       |              |                |                 |                          |                       |
| <b>Reasons that generally prevent/prevented you from attending <u>live</u> CE (ctd.)</b>               | <b>Strongly agree</b> | <b>Agree</b> | <b>Neutral</b> | <b>Disagree</b> | <b>Strongly disagree</b> | <b>Not Applicable</b> |
| 4. Interest in the topic                                                                               |                       |              |                |                 |                          |                       |
| 5. Family commitments                                                                                  |                       |              |                |                 |                          |                       |
| 6. Work obligations                                                                                    |                       |              |                |                 |                          |                       |
| 7. Easier to do online courses                                                                         |                       |              |                |                 |                          |                       |
| 8. Not finding adequate program to meet my practice needs                                              |                       |              |                |                 |                          |                       |
| 9. Cost to be replaced at the pharmacy/Close the pharmacy during the CE session (pharmacy owners only) |                       |              |                |                 |                          |                       |
| 10. Language used for the presentation                                                                 |                       |              |                |                 |                          |                       |
| 11. I learn very little during live CE                                                                 |                       |              |                |                 |                          |                       |
| 12. I already attend CE organized by pharmaceutical companies/international congresses                 |                       |              |                |                 |                          |                       |
| 13. I am already accessing online CE courses                                                           |                       |              |                |                 |                          |                       |
| 14. I am exempted (teaching, registered abroad...)                                                     |                       |              |                |                 |                          |                       |
| 15. I am <b>not</b> interested in doing any live CE                                                    |                       |              |                |                 |                          |                       |

Other reasons: \_\_\_\_\_

**28. Reasons for not/rarely adhering to OPL online CE Program:**

| QUESTION                                                                | Strongly agree | Agree | Neutral | Disagree | Strongly disagree | Not Applicable |
|-------------------------------------------------------------------------|----------------|-------|---------|----------|-------------------|----------------|
| 1. Difficulty accessing my OPL e-library account                        |                |       |         |          |                   |                |
| 2. Difficulty using the OPL Swank platform                              |                |       |         |          |                   |                |
| 3. Lack of interest in the topics available                             |                |       |         |          |                   |                |
| 4. Not finding adequate program to meet my practice needs               |                |       |         |          |                   |                |
| 5. Family commitments                                                   |                |       |         |          |                   |                |
| 6. Work obligations                                                     |                |       |         |          |                   |                |
| 7. OPL staff not supportive/accessible to help with e-Library and Swank |                |       |         |          |                   |                |
| 8. Courses only offered in English                                      |                |       |         |          |                   |                |
| 9. I am already attending live CE                                       |                |       |         |          |                   |                |
| 10. I am <b>not</b> interested in doing any online CE                   |                |       |         |          |                   |                |

Other reasons:

---

**29. Preferred length of live CE (you can choose more than 1):**

- Not interested       1-hour long    1 to 2-hour long       Half a day (4-hour long)
- All day (7 hours)       A weekend option (14 hours)       A 3-day option (Annual Congress)
- Long-term courses with certification (Masters, University Diploma...)

**30. Preferred language of CE in general (you can choose more than 1):**

- English    French    Not interested in any CE    Other: \_\_\_\_\_

**31. Preferred timing for live CE sessions:**

| QUESTION                | Week Days | Weekends |
|-------------------------|-----------|----------|
| 1. AM                   |           |          |
| 2. PM                   |           |          |
| 3. Evening (after 8 PM) |           |          |
| 4. Not interested       |           |          |

**32. Preferred CE topics:**

| QUESTION                                                 | Strongly agree | Agree | Neutral | Disagree | Strongly disagree |
|----------------------------------------------------------|----------------|-------|---------|----------|-------------------|
| 1. Laws and Regulations                                  |                |       |         |          |                   |
| 2. Guidelines for treating diseases                      |                |       |         |          |                   |
| 3. Medication Therapy Management                         |                |       |         |          |                   |
| 4. New drug dosage forms                                 |                |       |         |          |                   |
| 5. New medications                                       |                |       |         |          |                   |
| 6. Soft skills (skills development)                      |                |       |         |          |                   |
| 7. Management (community, hospital, companies)           |                |       |         |          |                   |
| 8. Preventive medicine (nutrition, physical activity...) |                |       |         |          |                   |
| 9. Information Technology (IT) related topics            |                |       |         |          |                   |
| 10. New quality and accreditation standards              |                |       |         |          |                   |
| 11. Not interested in any CE program                     |                |       |         |          |                   |

Other topics:

---



**33. Types of CE you already achieved (Choose 1 option only):**

- Did not start any CE       Online only       Live only  
 Online and Live equally       Majority of Online       Majority of Live

**34. Rate your global level of satisfaction with the CE organized/offered by the OPL:**

| TYPE           | Highly satisfied | Satisfied | Neutral | Dissatisfied | Highly dissatisfied | Not Applicable* |
|----------------|------------------|-----------|---------|--------------|---------------------|-----------------|
| Live in-person |                  |           |         |              |                     |                 |
| Online Courses |                  |           |         |              |                     |                 |
| Workshop       |                  |           |         |              |                     |                 |

\* Did not participate to this type of CE

Comments on the CE organized/offered by the OPL: \_\_\_\_\_

\_\_\_\_\_

\_\_\_\_\_

\_\_\_\_\_

\_\_\_\_\_

\_\_\_\_\_
